# Supplementary material
Source: MDPI journal article supplement (https://www.mdpi.com/2076-3263/8/7/247)
Supplement: s1 [file s1]

## Sheet: Lithochemical Data
		Paleoproterozoic Samples - SW Grenville Province																											Archean Samples - SW Grenville
			Holmden and Dickin (1995)			Dickin and McNutt (1990)		Dickin and Guo (2002)					Guo and Dickin (1996)								Herrell et al. (2006)	Dickin et al. (2008)	Dickin and North (2015)							Guo and Dickin (1996)
		Sample #	NB6	NB12	CH28	GF63	GF67	TA32	MT2	TA3	MT5	TA21	LV2	LV3	MAW6	MAW8	MAW9	VOl632	RB2	ZP12	DR 25	SB56.7	SH 2	SH 9A	SH12	SI 12	SI 11		Sample #	GF4	GF6	LV4	LV5	RB6	RB7	RB8	RB11	RB13	RB14	RB15A	RB16	RB17	RB18	RB21	BR3	BR12	BR13	VO136	VO160
		SiO2	66.31	69.53	68.54	64.35	64.83	61.09	61.35	67.66	51.34	68.37	63.13	56.45	67.68	68.48	71.53	59.55	65.72	60.22	62.11	64.16	55.59	73.06	71.86	65.43	65.29		SiO2	70.18	62.92	66.04	69.89	70.49	67.55	69.73	69.58	67.77	60.78	72.8	71.44	66.22	71.72	72.03	60.18	64.81	61.09	71.96	56.75
		TiO2	0.62	0.49	0.64	0.51	0.33	0.64	1.39	0.58	1.14	0.52	0.6	0.92	0.39	0.57	0.42	0.67	1.1	0.57	0.45	0.835	1.37	0.34	0.41	0.469	0.444		TiO2	0.31	0.68	0.51	0.37	0.25	0.48	0.32	0.44	0.32	0.68	0.25	0.34	0.46	0.01	0.27	0.45	0.36	0.44	0.23	0.73
		Al2O3	15.71	13.75	14.31	15.32	16.87	18.03	17.05	16.49	18.7	16.97	17.33	16.81	17.12	16.27	15.39	17.75	14.3	20.89	17.2	15.46	15.47	14.34	14.07	15.75	15.7		Al2O3	16.91	17.65	16.34	15.78	16.31	16.8	15.35	16.91	17.09	17.31	15.28	15.24	16.21	16	15.76	19.75	19.19	19.28	14.84	15.52
		Fe2O3	6.04	5.43	5.72	4.59	4.64	6.23	5.62	3.32	10.2	2.35	5.76	8.71	3.03	2.96	1.97	6.64	6.84	3.56	7.83	6.71	9.75	1.56	2.64	5.35	5.22		Fe2O3	2.04	3.99	3.99	2.99	2.4	2.96	2.77	2.54	2.64	6.27	2.08	2.71	3.79	1.63	1.76	4.42	2.81	4.81	2.69	8.85
		FeO	nd	nd	nd	nd	nd	nd	nd	nd	nd	nd	nd	nd	nd	nd	nd	nd	nd	nd	nd	nd	nd	nd	nd	nd	nd		FeO
		MNO	0.1	0.08	0.1	0.07	0.08	0.12	0.08	0.06	0.21	0.11	0.13	0.17	0.07	0.07	0.09	0.11	0.23	0.06	0.05	0.091	0.2	0.04	0.08	0.107	0.105		MNO	0.03	0.04	0.05	0.03	0.01	0.01	0.01	0.01	0.01	0.04	0.01	0.01	0.01	0.01	0.01	0.05	0.03	0.05	0.03	0.15
		MGO	0.22	0.36	0.31	3.44	1.83	0.38	3.38	0.56	4.24	0.29	1.12	3.77	0.69	0.66	0.4	2.79	0.74	0.71	0.87	2.11	3.42	0.43	0.82	2.1	2.04		MGO	0.73	2.55	1.91	1.1	1.24	1.45	0.77	0.64	1.05	2.99	0.55	1.04	1.75	0.56	1.35	2	1.47	1.82	0.92	5.34
		CAO	1.95	1.35	2.21	3.58	4.17	3.45	4.84	1.42	7.57	0.89	3.31	6.72	2.25	2.47	1.8	5.77	3.74	1.89	2.16	3.41	5.94	1.79	1.87	4.39	4.34		CAO	3.3	3.26	4.28	3.6	3.23	1.73	3.46	3.57	4.31	5.61	2.81	3.3	4.69	2.41	2.95	4.31	3.49	3.62	2.3	7.36
		Na2O	3.62	3.67	2.9	3.41	4.45	5.47	3.89	4.39	4.75	5.01	5.24	4.03	4.1	3.64	2.6	4.03	3.64	6.24	4.95	3.52	3.72	3.35	3.35	3.35	3.31		Na2O	5.33	6.22	5.42	4.85	4.65	4.15	5.16	4.96	5.48	4.7	5.19	4.62	5.72	4.92	4.39	5.98	6.17	5.77	5.86	3.32
		K2O	5.17	5.1	4.44	3.7	2.04	4.32	2.26	5.34	1.36	7	3.12	2.13	4.55	4.75	5.73	2.4	3.58	5.71	4.17	2.32	2.2	4.98	4.79	3.5	3.59		K2O	1.1	2.25	1.33	1.24	1.3	4.75	1.31	1.19	1.18	1.37	1.03	1.2	0.95	2.63	1.4	2.66	1.54	2.88	0.67	1.34
		H20+	0.18	0.19	0.7	0.83	0.6	nd	nd	nd	nd	nd	nd	nd	nd	nd	nd	nd	nd	nd	nd	nd	nd	nd	nd	nd	nd		H20+
		H2O-	nd	nd	nd	nd	nd	nd	nd	nd	nd	nd	nd	nd	nd	nd	nd	nd	nd	nd	nd	nd	nd	nd	nd	nd	nd		H2O-
		P2O5	0.08	0.05	0.13	0.19	0.16	0.26	0.13	0.18	0.51	0.07	0.26	0.3	0.13	0.13	0.07	0.29	0.35	0.14	0.19	0.21	0.52	0.06	0.1	0.12	0.12		P2O5	0.07	0.45	0.13	0.15	0.12	0.12	0.12	0.16	0.14	0.24	0.01	0.1	0.19	0.12	0.09	0.21	0.12	0.23	0.12	0.25
		Total	100	100	100	99.99	100	99.99	99.99	100	100.02	101.58	100	100.01	100.01	100	100	100	100.24	99.99	99.98	98.826	98.18	99.95	99.99	100.566	100.159		Total	100	100.01	100	100	100	100	99	100	99.99	99.99	100.01	100	99.99	100.01	100.01	100.01	99.99	99.99	99.62	99.61
		Streckeisen grid (Q-P diagram, Figure 9)																											Streckeisen grid (Q-P diagram, Figure 9)
		Si	1105.17	1158.83	1142.33	1072.5	1080.5	1018.17	1022.5	1127.67	855.667	1139.5	1052.17	940.833	1128	1141.33	1192.17	992.5	1095.33	1003.67	1035.17	1069.33	926.5	1217.67	1197.67	1090.5	1088.17		Si	1169.67	1048.67	1100.67	1164.83	1174.83	1125.83	1162.17	1159.67	1129.5	1013	1213.33	1190.67	1103.67	1195.33	1200.5	1003	1080.17	1018.17	1199.33	945.833
		K	110	108.511	94.4681	78.7234	43.4043	91.9149	48.0851	113.617	28.9362	148.936	66.383	45.3191	96.8085	101.064	121.915	51.0638	76.1702	121.489	88.7234	49.3617	46.8085	105.957	101.915	74.4681	76.383		K	23.4043	47.8723	28.2979	26.383	27.6596	101.064	27.8723	25.3191	25.1064	29.1489	21.9149	25.5319	20.2128	55.9574	29.7872	56.5957	32.766	61.2766	14.2553	28.5106
		Na	116.774	118.387	93.5484	110	143.548	176.452	125.484	141.613	153.226	161.613	169.032	130	132.258	117.419	83.871	130	117.419	201.29	159.677	113.548	120	108.065	108.065	108.065	106.774		Na	171.935	200.645	174.839	156.452	150	133.871	166.452	160	176.774	151.613	167.419	149.032	184.516	158.71	141.613	192.903	199.032	186.129	189.032	107.097
		Ca	34.8214	24.1071	39.4643	63.9286	74.4643	61.6071	86.4286	25.3571	135.179	15.8929	59.1071	120	40.1786	44.1071	32.1429	103.036	66.7857	33.75	38.5714	60.8929	106.071	31.9643	33.3929	78.3929	77.5		Ca	58.9286	58.2143	76.4286	64.2857	57.6786	30.8929	61.7857	63.75	76.9643	100.179	50.1786	58.9286	83.75	43.0357	52.6786	76.9643	62.3214	64.6429	41.0714	131.429
		Q	118.4	143.309	166.452	126.158	123.571	29.951	109.645	103.754	12.9412	58.689	75.9022	58.292	120.148	132.556	170.174	81.079	126.998	0	70.9404	152.939	71.3105	170.557	166.981	128.705	127.898		Q	155.263	62.2285	112.8	162.586	175.499	119.748	151.874	158.736	123.31	90.1191	181.658	183.039	107.327	155.087	193.647	33.5248	86.7097	48.888	169.109	92.0513
		P	-41.5956	-33.9836	-38.5446	-95.2052	-174.608	-146.144	-163.827	-53.353	-259.468	-28.5696	-161.756	-204.681	-75.6281	-60.4627	5.90107	-181.972	-108.035	-113.551	-109.525	-125.08	-179.263	-34.0714	-39.5425	-111.989	-107.891		P	-207.46	-210.987	-222.969	-194.354	-180.019	-63.7	-200.365	-198.431	-228.632	-222.643	-195.683	-182.429	-248.053	-145.788	-164.504	-213.272	-228.588	-189.495	-215.848	-210.015
		Trace element data - discrimination diagrams (Figure 10a,b)
		Rb	74.1	111	70	118	69.4	-	126.8	122.9	-	67.9	65.6	59.1	nd	nd	-	nd	84.1	87.7	87.6
		Y	32.3	56.3	42.1	23.1	14	-	18.7	57.3	-	43.5	39.4	24.5	28.4	31.1	-	12.5	62.5	45.9	34.1
		Nb	26.9	35.7	27.3	10.8	9.6	-	10.3	18.6	-	14.3	12.1	10	14.5	14.2	-	8.8	32.1	10.7	13
		Y+Nb	59.2	92	69.4	33.9	23.6	-	29	75.9	-	57.8	51.5	34.5	42.9	45.3	-	21.3	94.6	56.6	47.1
		Paleoproterozoic Makkovik Samples - Cape Harrison Domain
			Moumblow et al. (2018)
		Sample #	CG79-130	CG79-180	CG79-196	CG79-198A	CG79-201	CG79-251A	CG79-269	CG79-273	CG79-308	CG79-316	CG79-493	CG79-500	CG79-545	CG79-578	CG79-320	CG79-339	CG79-344	CG79-349	CG79-383	CG79-407	CG79-530	CG79-535	CG79-554	CG79-579	CG79-611	CG79-613	CG79-629	CG79-753
		SiO2	70.7	71.1	61.2	65.3	67.8	65.7	67.5	58.5	72.2	70.9	66.6	68.2	77.1	69.6	71.4	58.1	65.9	70	66.9	73.8	60.8	70.3	56.4	74.9	58.7	57	57.4	57.5
		TiO2	0.43	0.37	0.67	0.67	0.49	0.69	0.64	0.7	0.24	0.3	0.53	0.49	0.08	0.21	0.18	0.74	0.42	0.27	0.43	0.3	1.09	0.34	0.75	0.29	1	0.83	0.91	0.69
		Al2O3	15.05	15.7	16.05	16.7	15.95	16.45	16.3	19.45	15.2	15	15.8	14.95	12.35	15.35	15.25	16.4	17.5	15.9	16.7	13.65	16.4	16.2	20	11.75	18.6	18.15	18.2	16.95
		FeO	1.15	1.61	4.11	2.7	1.78	3.27	2.48	3.38	1.21	1.55	2.93	2.65	1.61	1.06	0.87	4.18	1.91	1.54	2.09	1.28	4.09	1.03	3.58	0.92	4.02	4.11	4.35	4.38
		Fe2O3	1.56	0.86	1.4	1.24	1.03	1.01	0.66	2.36	0.65	0.68	0.61	1.1	0.63	0.59	0.8	3.09	1.59	0.4	1.15	0.7	1.28	0.32	2.84	1.06	1.86	2.66	2.17	1.98
		FeOt	0	0	0	0	0	0	0	0	0	0	0	0	0	0	0	0	0	0	0	0	0	0	0	0	0	0	0	0
		Fe2O3t	0	0	0	0	0	0	0	0	0	0	0	0	0	0	0	0	0	0	0	0	0	0	0	0	0	0	0	0
		MnO	0.05	0.06	0.11	0.06	0.07	0.07	0.05	0.1	0.04	0.05	0.09	0.07	0.02	0.04	0.03	0.15	0.06	0.03	0.06	0.04	0.13	0.02	0.14	0.01	0.1	0.11	0.11	0.13
		MgO	0.79	0.65	2.99	1.58	0.9	1.98	1.05	2.18	0.43	0.7	1.16	1.71	0.05	0.51	0.48	4.71	0.94	0.57	0.91	0.32	1.52	0.47	2.08	0.58	1.85	3	2.4	3.08
		CaO	2.37	2.19	4.55	3.62	2.55	3.85	2.69	5.19	1.76	2.13	2.41	2.76	0.34	1.49	2.09	6.53	3.28	2.13	2.46	0.86	3.41	2.33	4.84	0.9	4.56	5.05	4.95	5.69
		Na2O	4.07	4.6	4.11	4.44	4.5	4.14	4.23	4.99	4.1	4.01	4.07	3.99	3.37	4.22	4.05	3.18	4.29	4.11	4.28	4.23	4.6	4.16	5.32	2	4.59	4.36	4.18	4.18
		K2O	4.12	4.03	3.94	3.91	4.42	3.7	4.8	3	4.53	4.07	4.61	2.81	5.75	4.68	4.28	1.65	4.08	4.36	4.76	4.83	4.48	4.69	3.33	5.69	3.95	3.49	4.28	2.94
		P2O5	0.07	0.02	0.02	0.01	0.01	0.02	0.01	0.07	0.01	0.07	0.13	0.09	0	0.05	0.05	0.33	0.13	0.05	0.15	0.05	0.4	0.04	0.38	0.19	0.34	0.3	0.23	0.3
		LOI	0.68	0.84	1.06	0.81	1.23	0.95	0.46	0.95	1.03	0.93	0.74	0.93	0.85	0.94	0.9	1.25	0.76	0.75	1.04	0.67	0.46	0.49	0.97	0.72	1.16	0.66	0.95	0.77
		Total	101.04	102.03	100.21	101.04	100.73	101.83	100.87	100.87	101.4	100.39	99.68	99.75	102.15	98.74	100.38	100.31	100.86	100.11	100.93	100.73	98.66	100.39	100.63	99.01	100.73	99.72	100.13	98.59
		Streckeisen grid (Q-P diagram, Figure 9)
		Si	1178.33	1185	1020	1088.33	1130	1095	1125	975	1203.33	1181.67	1110	1136.67	1285	1160	1190	968.333	1098.33	1166.67	1115	1230	1013.33	1171.67	940	1248.33	978.333	950	956.667	958.333
		K	87.6596	85.7447	83.8298	83.1915	94.0426	78.7234	102.128	63.8298	96.383	86.5957	98.0851	59.7872	122.34	99.5745	91.0638	35.1064	86.8085	92.766	101.277	102.766	95.3191	99.7872	70.8511	121.064	84.0426	74.2553	91.0638	62.5532
		Na	131.29	148.387	132.581	143.226	145.161	133.548	136.452	160.968	132.258	129.355	131.29	128.71	108.71	136.129	130.645	102.581	138.387	132.581	138.065	136.452	148.387	134.194	171.613	64.5161	148.065	140.645	134.839	134.839
		Ca	42.3214	39.1071	81.25	64.6429	45.5357	68.75	48.0357	92.6786	31.4286	38.0357	43.0357	49.2857	6.07143	26.6071	37.3214	116.607	58.5714	38.0357	43.9286	15.3571	60.8929	41.6071	86.4286	16.0714	81.4286	90.1786	88.3929	101.607
		Q	145.614	134.797	69.4229	93.2652	107.106	106.895	104.397	38.4168	151.518	152.581	111.934	157.535	193.236	133.225	150.077	107.353	101.868	138.185	103.04	160.544	53.4763	128.837	13.2503	219.817	39.7183	41.6471	34.0578	54.3144
		P	-85.9522	-101.75	-130.001	-124.677	-96.6545	-123.575	-82.3597	-189.817	-67.3037	-80.7948	-76.2409	-118.208	7.55932	-63.1617	-76.9028	-184.081	-110.15	-77.8504	-80.7165	-49.0428	-113.961	-76.0135	-187.19	40.4763	-145.451	-156.568	-132.168	-173.893
		Trace element data - discrimination diagrams (Figure 10a,b)
		Rb	147	125	136	144	72	120	122	89	116	112	149	152	122	130	95	57	94	152	101	156	97	108	53	188	105	85	134	72
		Y	11	23	23	16	83	16	18	15	10	11	16	22	13	9	7	23	5	8	10	25	30	11	17	3	17	16	15	18
		Nb	10	11	13	10	22	10	15	7	9	12	11	13	13	12	5	6	6	10	8	27	18	12	4	6	14	8	8	4
		Y+Nb	21	34	36	26	105	26	33	22	19	23	27	35	26	21	12	29	11	18	18	52	48	23	21	9	31	24	23	22
[truncated: 3 more columns]
